# Supplementary material
Source: PubMed Central journal article supplement (PMC3683867)
Supplement: NIHMS388792-supplement-1_si_001.pdf [file NIHMS388792-supplement-1_si_001.pdf]

# Biodegradable Optode-Based Nanosensors for in Vivo Monitoring

*Mary K. Balaconis<sup>†</sup> and Heather A. Clark<sup>‡\*</sup>*

<sup>†</sup>Department of Bioengineering, <sup>‡</sup>Department of Pharmaceutical Sciences

Northeastern University, 360 Huntington Avenue, Boston, Massachusetts 02115, United States

\*Correspondence: Heather A. Clark, Ph.D, [h.clark@neu.edu](mailto:h.clark@neu.edu)

## ABSTRACT

The Supplementary Information includes time series videos of the fluorescence reversibility of the sodium nanosensors.

**Video S-1. Dynamic fluorescence response of biodegradable sodium nanosensors.** Time-lapse series of sodium nanosensors encapsulated in a microdialysis hollow fiber as they are exposed to 0 mM and 500 mM NaCl solutions. Images were acquired using a 488 nm laser and emission was collected every 11.6 seconds using a long pass filter. The time series shown here was sped up to a speed of 7 frames per second (fps).

**Video S-2. Dynamic fluorescence response of biodegradable sodium nanosensors.** Time-lapse series of sodium nanosensors encapsulated in a microdialysis hollow fiber as they are exposed to 0 mM and 500 mM NaCl solutions. Images were acquired using a 639 nm laser and emission was collected every 11.6 seconds using a long pass filter. The time series shown here was sped up to a speed of 7 fps.
